# Supplementary material for: Geospatial patterns of progress towards UNAIDS ‘95-95-95’ targets and community vulnerability in Zambia: insights from population-based HIV impact assessments
Source: HighWire-hosted journal article supplement (doi:10.1136/bmjgh-2023-012629), 2023-10-01

## Supplementary Materials for: Geospatial Patterns of Progress towards UNAIDS "95-95-95" Targets and Community Vulnerability in Zambia: Insights from Population-based HIV Impact Assessments

Diego F Cuadros<sup>1\*</sup>, Tuhin Chowdhury<sup>1</sup>, Masabho Milali<sup>2</sup>, Daniel Citron<sup>2</sup>, Sulani Nyimbili<sup>3</sup>, Natalie Vlahakis<sup>3</sup>, Theodora Savory<sup>3</sup>, Lloyd Mulenga<sup>4</sup>, SuilANJI Sivile<sup>4</sup>, Khozya Zyambo<sup>4</sup>, Anna Bershteyn<sup>2</sup>

<sup>1</sup>Digital Epidemiology Laboratory, Digital Futures, University of Cincinnati, Cincinnati, OH, USA

<sup>2</sup>Department of Population Health, New York University Grossman School of Medicine, New York, NY, USA

<sup>3</sup>Centre for Infectious Disease Research in Zambia (CIDRZ), Lusaka, Zambia

<sup>4</sup>National HIV Program, Ministry of Health, Lusaka, Zambia

### Supplementary Figures

**Supplementary Figure 1.** Spatial location of the 511 enumeration areas (red dots) where the 2016 Zambia Population-based HIV Impact Assessment was conducted

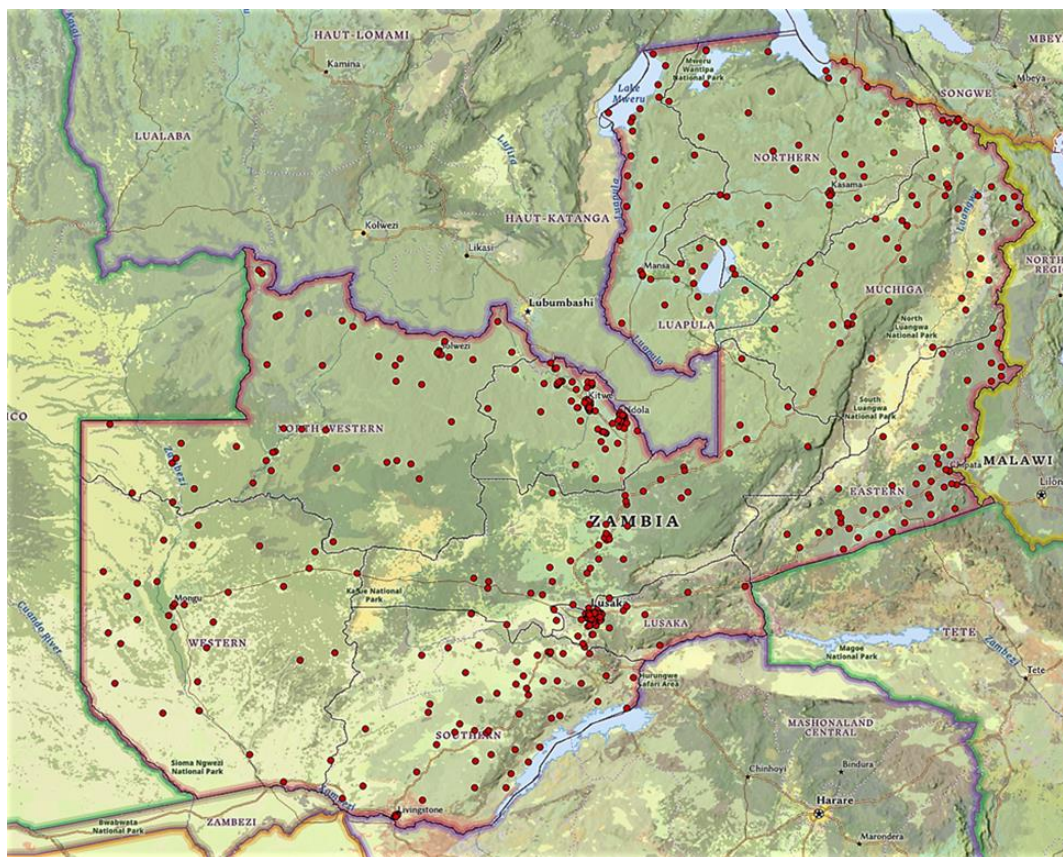

**Supplementary Figure 2.** Estimates of each “95” by age and sex

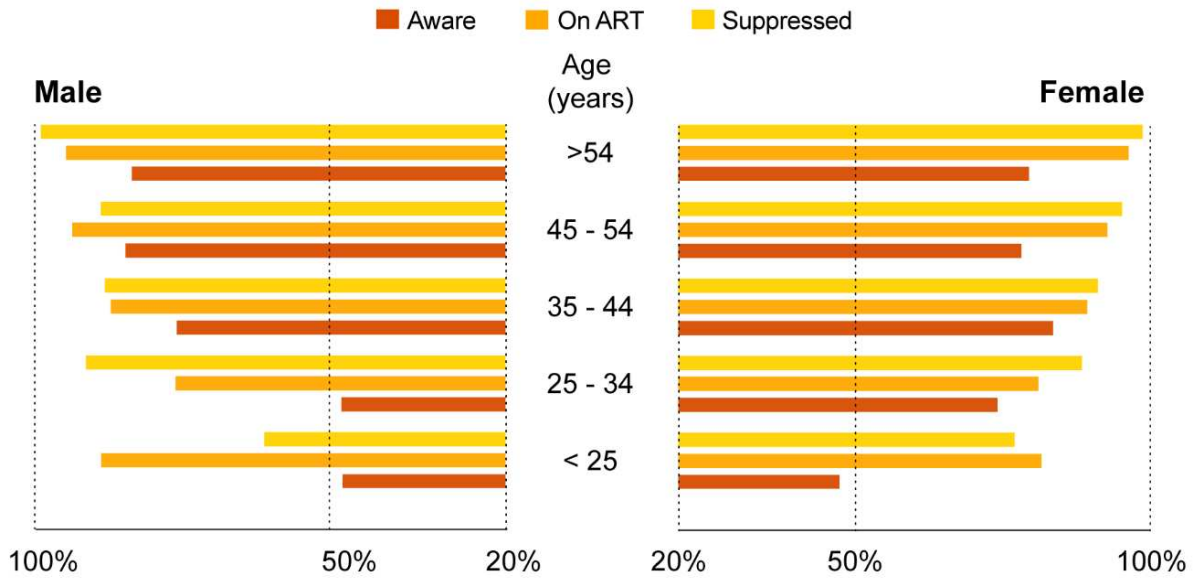

**Supplementary Figure 3.** Bivariate maps of health index with A) Prevalence of HIV positive individuals aware of their status; B) prevalence of HIV positive individuals aware of their status on ART treatment; and C) prevalence of HIV positive individuals aware of their status on ART treatment that are viral load suppressed

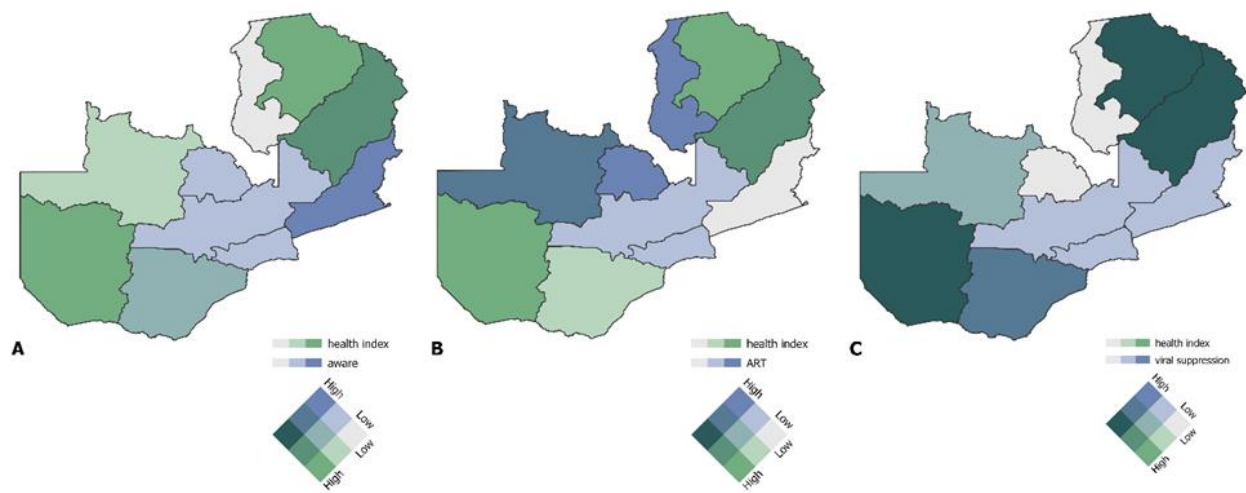

Supplement: bmjgh-2023-012629supp002_data_supplement.pdf [file bmjgh-2023-012629supp002_data_supplement.pdf]
